# Supplementary material
Source: PubMed Central journal article supplement (PMC8639752)
Supplement: NIHMS1738932-supplement-2.pdf [file NIHMS1738932-supplement-2.pdf]

**Supplemental Table 1.** Subject demographics and administered amounts of [<sup>18</sup>F]DASA-23 in healthy volunteers

| Volunteer Number | Sex    | Age (y) | Height (cm) | Weight (kg) | Injected Activity (MBq) | Injected mass DASA-23 (μg) | Normalized injected mass (ng/kg) |
|------------------|--------|---------|-------------|-------------|-------------------------|----------------------------|----------------------------------|
| 1                | Male   | 34      | 168         | 84          | 295                     | 1.8                        | 21                               |
| 2                | Male   | 31      | 153         | 52          | 304                     | 3.4                        | 66                               |
| 3                | Female | 30      | 158         | 59          | 303                     | 1.3                        | 23                               |
| 4                | Male   | 34      | 165         | 96          | 287                     | 1.2                        | 12                               |
| 5                | Female | 21      | 155         | 64          | 286                     | 2.5                        | 39                               |
| 6                | Male   | 38      | 184         | 83          | 202                     | 2.2                        | 26                               |
