# Supplementary material
Source: PubMed Central journal article supplement (PMC8639752)
Supplement: NIHMS1738932-supplement-3.pdf [file NIHMS1738932-supplement-3.pdf]

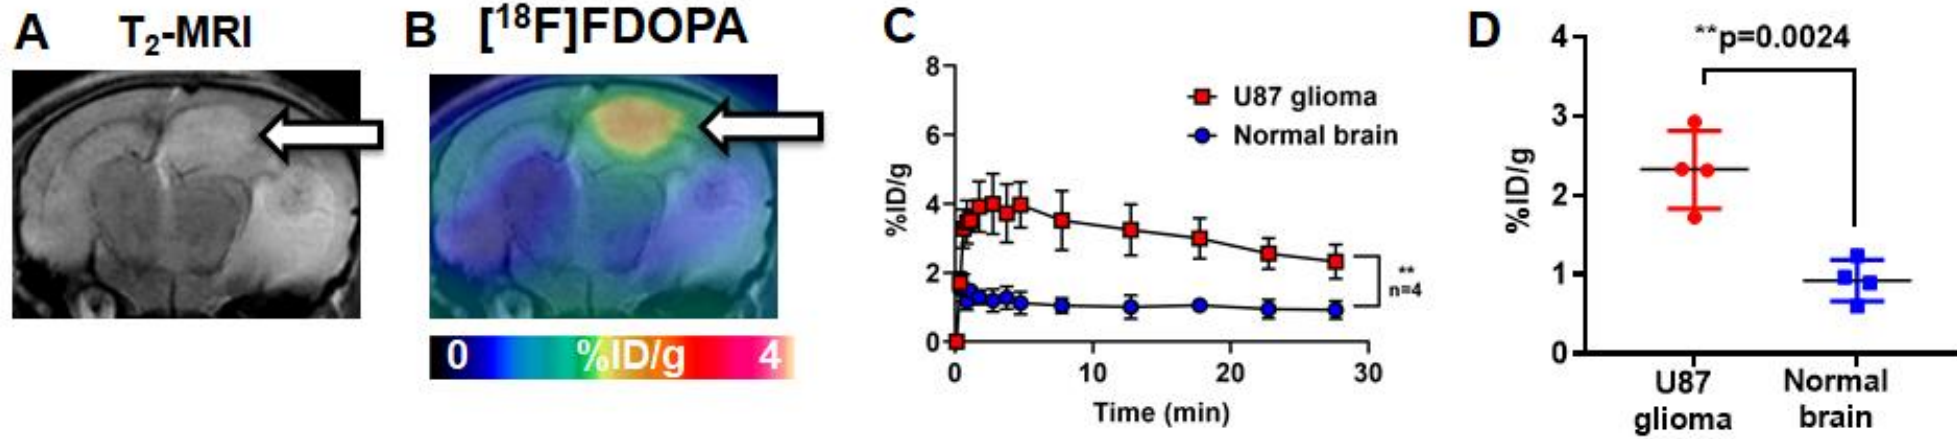

**Supplemental Fig. 2.** Comparative metabolic PET/CT imaging in U87-GFP/luc GBM mice. **A** Representative T<sub>2</sub>-MRI of a mouse bearing an orthotopic U87-GFP/luc GBM. **B** Representative fused summed 10-30 min [<sup>18</sup>F]FDOPA PET/CT/MRI. **C** [<sup>18</sup>F]FDOPA time activity curves reflecting uptake in U87-GFP/luc orthotopic GBM and contralateral normal brain (n=4). **D** Quantitation of radioactivity at 30 mins post [<sup>18</sup>F]FDOPA administration in U87-GFP/luc GBM and contralateral normal brain, p=0.0024, n=4.
