# Supplementary material
Source: PubMed Central journal article supplement (PMC8639752)
Supplement: NIHMS1738932-supplement-4.pdf [file NIHMS1738932-supplement-4.pdf]

**Supplemental Table 2.** Subject demographics and administered amounts of [<sup>18</sup>F]DASA-23 in brain tumor patients

| Patient number | Sex    | Age (y) | Height (cm) | Weight (kg) | Injected Activity (MBq) | Injected mass DASA-23 (μg) | Normalized injected mass (ng/kg) |
|----------------|--------|---------|-------------|-------------|-------------------------|----------------------------|----------------------------------|
| IC-1           | Male   | 39      | 185         | 100         | 300                     | 2.6                        | 26                               |
|                |        |         |             |             | 305                     | 2.1                        | 21                               |
| IC-2           | Female | 88      | 154         | 56          | 297                     | 1.9                        | 33                               |
| IC-3           | Female | 36      | 160         | 60          | 273                     | 1.5                        | 24                               |
| IC-4           | Male   | 39      | 180         | 88          | 298                     | 1.5                        | 19                               |
