# Supplementary material
Source: PubMed Central journal article supplement (PMC8639752)
Supplement: NIHMS1738932-supplement-5.pdf [file NIHMS1738932-supplement-5.pdf]

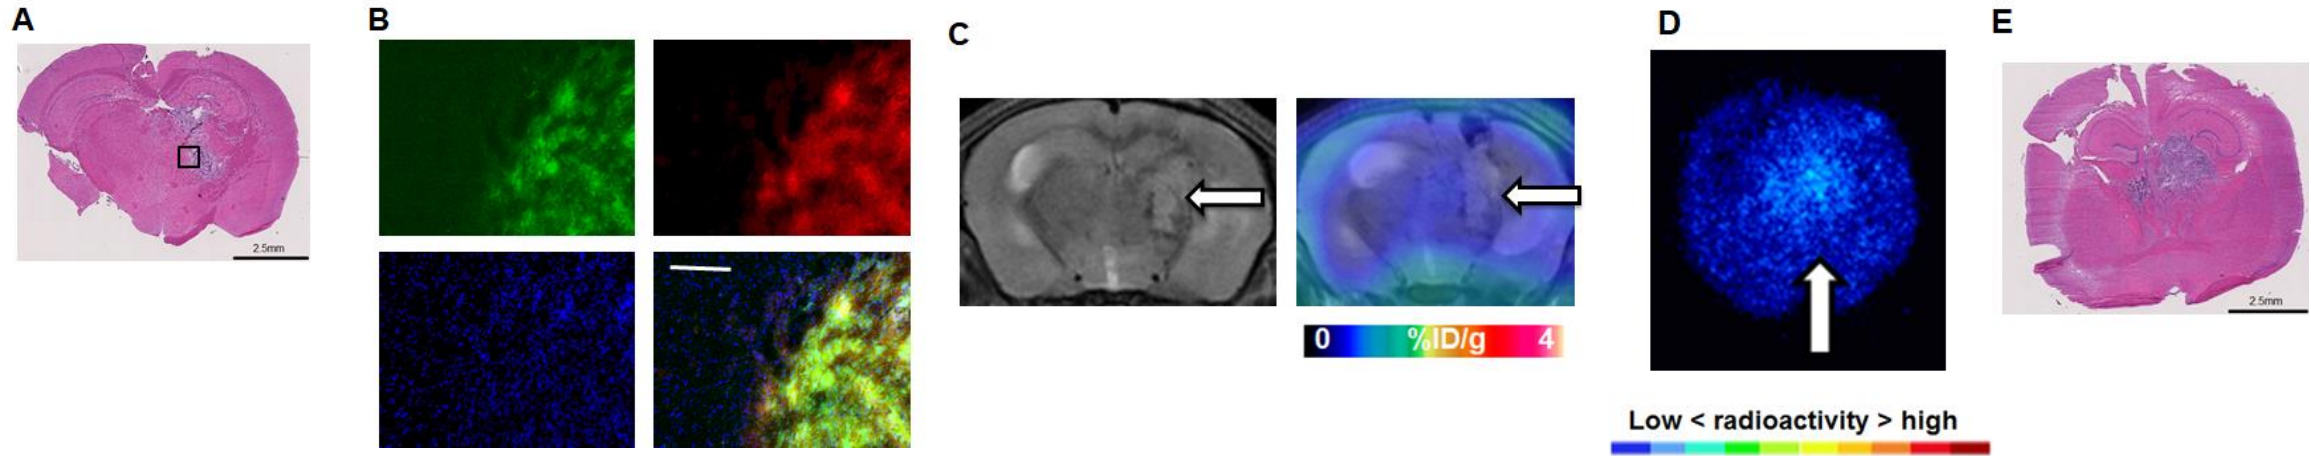

**Supplemental Fig. 3.** Evaluation of PKM2 expression in U87-GFP/luc orthotopic GBM **A** Hematoxylin and eosin (H&E) stain of a mouse brain bearing an orthotopic U87-GFP/luc GBM depicting the region for analysis with immunofluorescence staining. **B** Immunofluorescence staining of U87-GFP/luc GBM at the border of the normal brain. Endogenous GFP U87 tumor is shown in green, PKM2 in red and DAPI in blue. The merged image shows all three channels. Scale bar is 250  $\mu$ m. **C** Representative image of a mouse bearing an orthotopic U87-GFP/luc GBM (white arrow), the presence of the tumor is confirmed with T2-weighted MRI. A representative [ $^{18}$ F]DASA-23 fused PET/CT/MR image under blocking conditions is shown summed 10-30 min post tracer administration. **D** Autoradiography of U87-GFP/luc orthotopic GBM mice after pre-treatment with structurally distinct PKM2 activator, TEPP46. Representative autoradiography brain sections at 30-mins after administration of [ $^{18}$ F]DASA-23 under blocking conditions are shown. White arrow indicates location of tumor. **E** H&E staining of adjacent sections demonstrating the presence of the U87 GBM. Scale bar is 2.5mm.
