# Supplementary material
Source: PubMed Central journal article supplement (PMC8639752)
Supplement: NIHMS1738932-supplement-6.pdf [file NIHMS1738932-supplement-6.pdf]

**Supplemental Table 3.** Clinical Characteristics of patients imaged with [<sup>18</sup>F]DASA-23

| Patient | Diagnosis                                           | Molecular Characteristics  | Time between diagnosis and [ <sup>18</sup> F]DASA-23 PET | Medications at [ <sup>18</sup> F]DASA-23 PET scan                                                                                                                                                                                   | Time between surgery/biopsy and [ <sup>18</sup> F]DASA-23 PET | Additional notes                                                                                                                                                    |
|---------|-----------------------------------------------------|----------------------------|----------------------------------------------------------|-------------------------------------------------------------------------------------------------------------------------------------------------------------------------------------------------------------------------------------|---------------------------------------------------------------|---------------------------------------------------------------------------------------------------------------------------------------------------------------------|
| IC-1    | WHO grade IV recurrent glioblastoma                 | IDH1 wt, MGMT methylated   | -4 months                                                | Famotidine (20mg), citalopram (20mg), gabapentin (1200 mg),#Norco 5-325, levetiracetam (2000mg)<br><br>Post therapy scan after administration of bevacizumab (683 mg) and temozolomide 150mg/m <sup>2</sup> 5 days per 28 day cycle | +2.5 months                                                   | Patient was previously receiving an experimental treatment BPM31510 (NCT03020602), tumor progression was identified ~2 weeks prior to [ <sup>18</sup> F]DASA-23 PET |
| IC-2    | WHO grade IV newly diagnosed glioblastoma           | IDH1 wt, MGMT unmethylated | -3 months                                                | Dexamethasone (1mg), ondansetron (8mg), rabeprazole (20mg), temozolomide (250mg), bevacizumab (463mg)                                                                                                                               | -3 months                                                     |                                                                                                                                                                     |
| IC-3    | WHO Grade IV Diffuse Midline Glioma, H3 K27M-mutant | IDH1 wt                    | -12 months                                               | Ondansetron (8mg), bevacizumab (348mg)                                                                                                                                                                                              | -12 months                                                    | Clinically stable for ~5 months at time of [ <sup>18</sup> F]DASA-23 PET                                                                                            |
| IC-4    | WHO grade III recurrent anaplastic astrocytoma      | IDH mutant, ATRX mutation  | -7 months                                                | Levetiracetam (1000mg), ondansetron (8mg), temozolomide(100mg), bevacizumab (625mg)                                                                                                                                                 | -7 months                                                     |                                                                                                                                                                     |
