# Supplementary material
Source: PubMed Central journal article supplement (PMC8639752)
Supplement: NIHMS1738932-supplement-7.pdf [file NIHMS1738932-supplement-7.pdf]

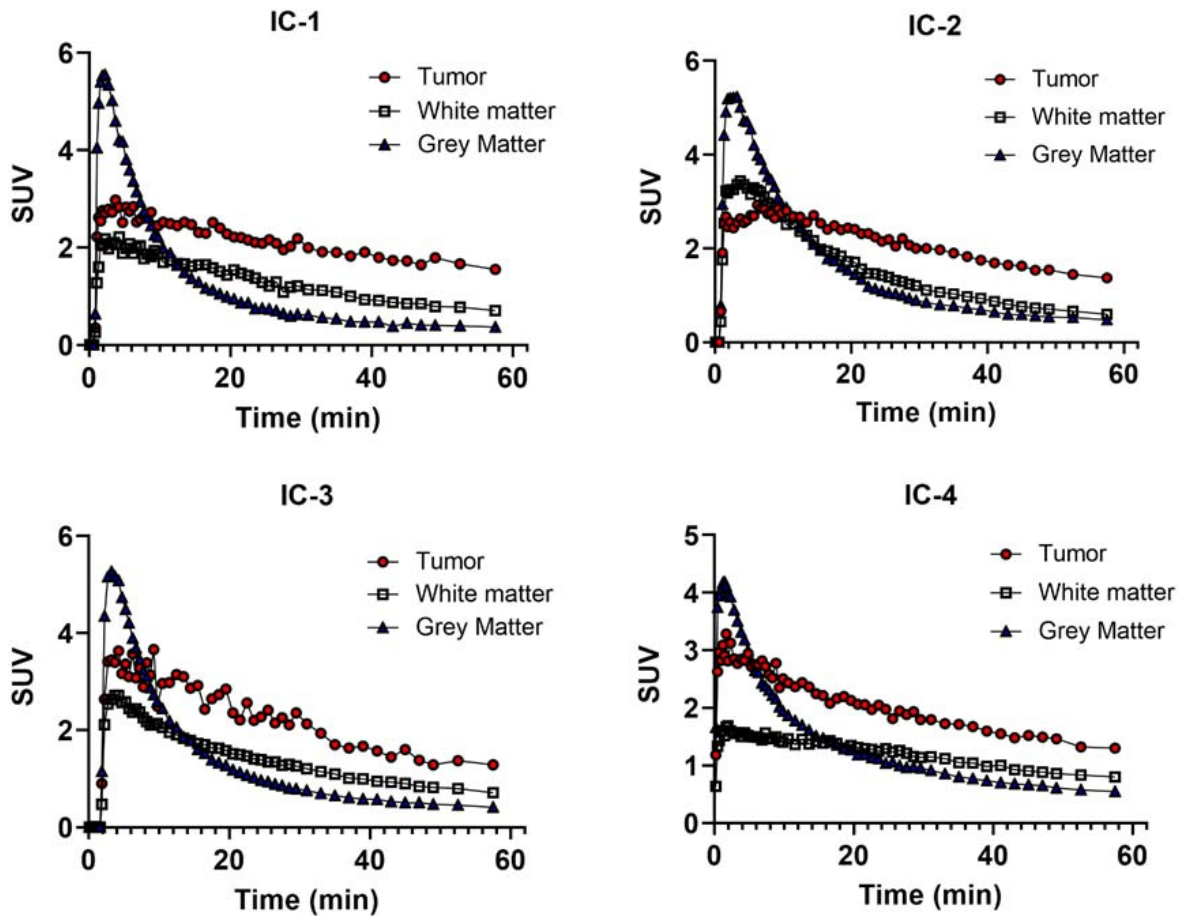

**Supplemental Fig. 4.** Time activity curves for tracer uptake on  $[^{18}\text{F}]\text{DASA-23}$  PET scan for intracranial patients 1-4. Time course of tracer accumulation in tumor, white matter and gray matter is shown.
