# Supplementary material
Source: PubMed Central journal article supplement (PMC8639752)
Supplement: NIHMS1738932-supplement-8.pdf [file NIHMS1738932-supplement-8.pdf]

**Supplemental Table 4.** Vital signs of the patients administered with [<sup>18</sup>F]DASA-23. Vital signs were recorded before [<sup>18</sup>F]DASA-23 injection and at the completion of the scanning protocol.

| Patient vital signs             | Pre-scan     | Post-scan   |
|---------------------------------|--------------|-------------|
| Heart rate (bpm)                | 70.3 ± 9.2   | 72.3 ± 15.1 |
| Oximetry (SO <sub>2</sub> )     | 99.3 ± 1.0   | 99.5 ± 0.6  |
| Temperature (°C)                | 36.8 ± 0.3   | 36.7 ± 0.4  |
| Systolic blood pressure (mmHg)  | 127.3 ± 16.2 | 132.0 ± 9.3 |
| Diastolic blood pressure (mmHg) | 75.5 ± 6.2   | 76.8 ± 8.8  |
| Respiratory rate                | 10.8 ± 3.8   | 11.8 ± 2.1  |
