# Supplementary material
Source: PubMed Central journal article supplement (PMC8639752)
Supplement: NIHMS1738932-supplement-10.pdf [file NIHMS1738932-supplement-10.pdf]

**Supplemental Table 5.** Hematology laboratory testing results of patients imaged with [<sup>18</sup>F]DASA-23.

| Patient hematology lab values                        | Pre-scan         | Within 7 days after injection |
|------------------------------------------------------|------------------|-------------------------------|
| White blood cell count ( $\times 10^3/\mu\text{L}$ ) | $6.9 \pm 2.3$    | $6.2 \pm 2.5$                 |
| Red blood cell count ( $\times 10^6/\mu\text{L}$ )   | $4.5 \pm 0.3$    | $4.6 \pm 0.3$                 |
| Hemoglobin concentration (g/dL)                      | $13.4 \pm 1.6$   | $14.1 \pm 1.7$                |
| Hematocrit concentration (%)                         | $41.6 \pm 3.2$   | $42.9 \pm 4.4$                |
| Red cell distribution width (%)                      | $13.6 \pm 0.9$   | $13.9 \pm 0.9$                |
| Platelet count ( $\times 10^3/\mu\text{L}$ )         | $190.0 \pm 61.4$ | $224.7 \pm 52.3$              |
| Mean corpuscular volume (fL)                         | $92.9 \pm 5.5$   | $92.3 \pm 6.8$                |
| Mean corpuscular hemoglobin (pg)                     | $30.0 \pm 2.2$   | $30.3 \pm 2.3$                |
| Mean corpuscular hemoglobin concentration (g/dL)     | $32.2 \pm 1.5$   | $32.8 \pm 0.75$               |
| Neutrophil absolute ( $\times 10^3/\mu\text{L}$ )    | $4.3 \pm 2.5$    | $3.8 \pm 2.1$                 |
| Lymphocyte absolute ( $\times 10^3/\mu\text{L}$ )    | $1.6 \pm 0.5$    | $1.6 \pm 0.3$                 |
| Monocyte absolute ( $\times 10^3/\mu\text{L}$ )      | $0.6 \pm 0.3$    | $0.6 \pm 0.3$                 |
| Eosinophil absolute ( $\times 10^3/\mu\text{L}$ )    | $0.3 \pm 0.3$    | $0.2 \pm 0.2$                 |
| Basophil absolute ( $\times 10^3/\mu\text{L}$ )      | $0.05 \pm 0.03$  | $0.06 \pm 0.04$               |
