# Supplementary material
Source: PubMed Central journal article supplement (PMC8639752)
Supplement: NIHMS1738932-supplement-11.pdf [file NIHMS1738932-supplement-11.pdf]

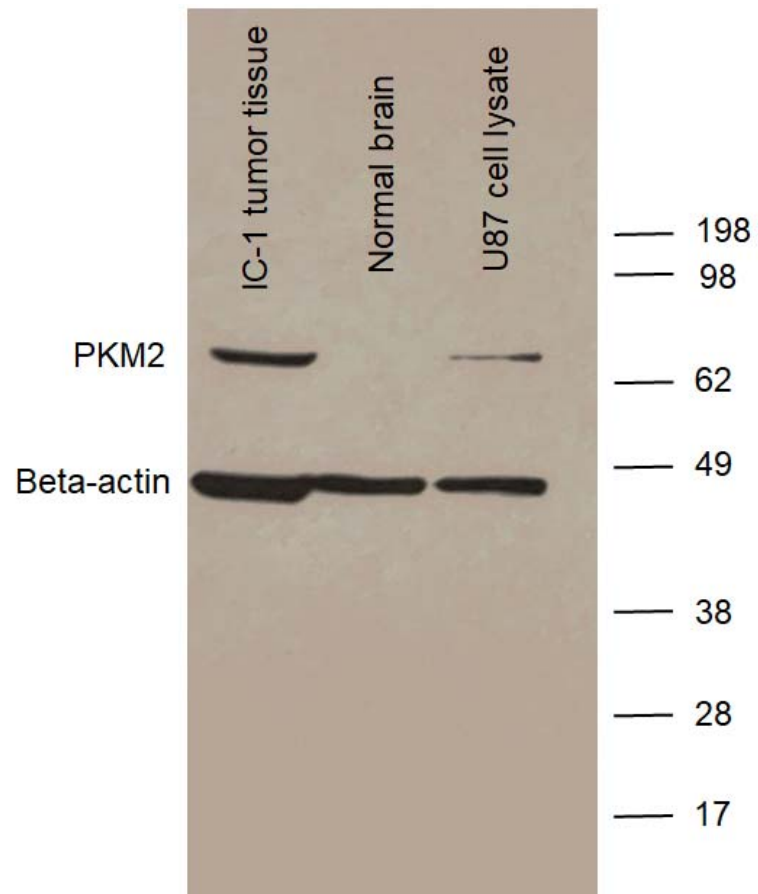

**Supplemental Fig. 6.** Western blot analysis of PKM2 expression in IC-1 tumor tissue compared to a normal brain sample and U87 cell lysate. Beta-actin is shown as a loading control.
