# Supplementary material
Source: PubMed Central journal article supplement (PMC8639752)
Supplement: NIHMS1738932-supplement-12.pdf [file NIHMS1738932-supplement-12.pdf]

**Supplemental Table 6.** Blood chemistry laboratory testing results of the patients imaged with [<sup>18</sup>F]DASA-23.

| Patient blood chemistry lab values          | Pre-scan    | Within 7 days after injection |
|---------------------------------------------|-------------|-------------------------------|
| Sodium, Ser/Plas (mmol/L)                   | 141.5 ± 1.3 | 140.5 ± 2.4                   |
| Potassium, Ser/Plas (mmol/L)                | 4.2 ± 0.1   | 3.9 ± 0.1                     |
| Calcium, Ser/Plas (mmol/L)                  | 9.3 ± 0.5   | 9.2 ± 0.3                     |
| Chloride, Ser/Plas (mmol/L)                 | 104.3 ± 2.5 | 103.0 ± 4.1                   |
| Anion gap (mmol/L)                          | 9.5 ± 2.1   | 9.5 ± 1.9                     |
| CO <sub>2</sub> , Ser/Plas (mmol/L)         | 27.7 ± 1.0  | 28.0 ± 0.1                    |
| Urea nitrogen, Ser/Plas (mg/dL)             | 14.0 ± 4.2  | 13.5 ± 5.8                    |
| Creatinine conc (mg/dL)                     | 0.8 ± 0.1   | 0.7 ± 0.1                     |
| Glucose, Ser/Plas (mg/dL)                   | 92.0 ± 5.6  | 89.5 ± 10.1                   |
| Protein, total, Ser/Plas (g/dL)             | 6.9 ± 0.4   | 7.2 ± 0.3                     |
| Albumin, Ser/Plas (g/dL)                    | 4.1 ± 0.4   | 4.0 ± 0.5                     |
| Total Bilirubin, Ser/Plas (mg/dL)           | 0.4 ± 0.1   | 0.4 ± 0.2                     |
| Alkaline phosphatase, Total, Ser/Plas (U/L) | 70.1 ± 16.9 | 66.8 ± 10.7                   |
| Aspartate aminotransferase, Ser/Plas (U/L)  | 28.5 ± 9.4  | 26.0 ± 9.3                    |
| Alanine Aminotransferase, Ser/Plas (U/L)    | 37.7 ± 10.1 | 37.5 ± 5.2                    |
| Globulin (g/dL)                             | 2.9 ± 0.3   | 3.3 ± 0.4                     |
