# Supplementary material
Source: PubMed Central journal article supplement (PMC8639752)
Supplement: NIHMS1738932-supplement-13.pdf [file NIHMS1738932-supplement-13.pdf]

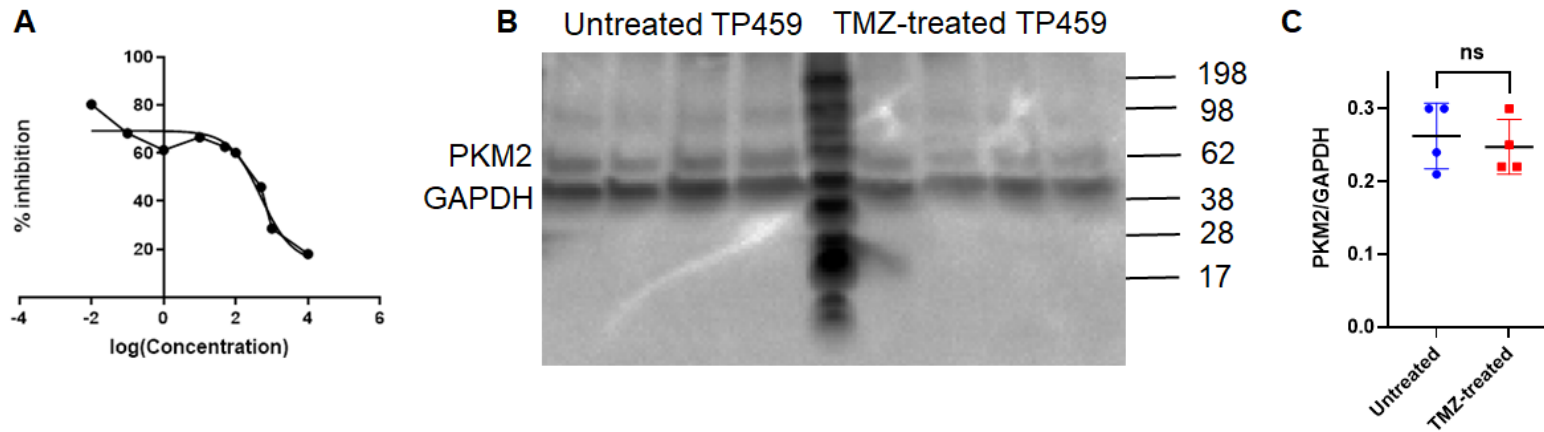

**Supplemental Fig. 7.** **A** IC<sub>50</sub> curve for TMZ in TP459 neurospheres. IC<sub>50</sub> = 495 μM. **B** Western blot analysis of PKM2 expression in untreated and TMZ-treated TP459 cell lysates. GAPDH is shown as a loading control. **C** Quantification of PKM2/GAPDH ratios demonstrate a non-significant difference between untreated and TMZ-treated TP459 cells (t-test).
