# Supplementary material
Source: PubMed Central journal article supplement (PMC8639752)
Supplement: NIHMS1738932-supplement-14.pdf [file NIHMS1738932-supplement-14.pdf]

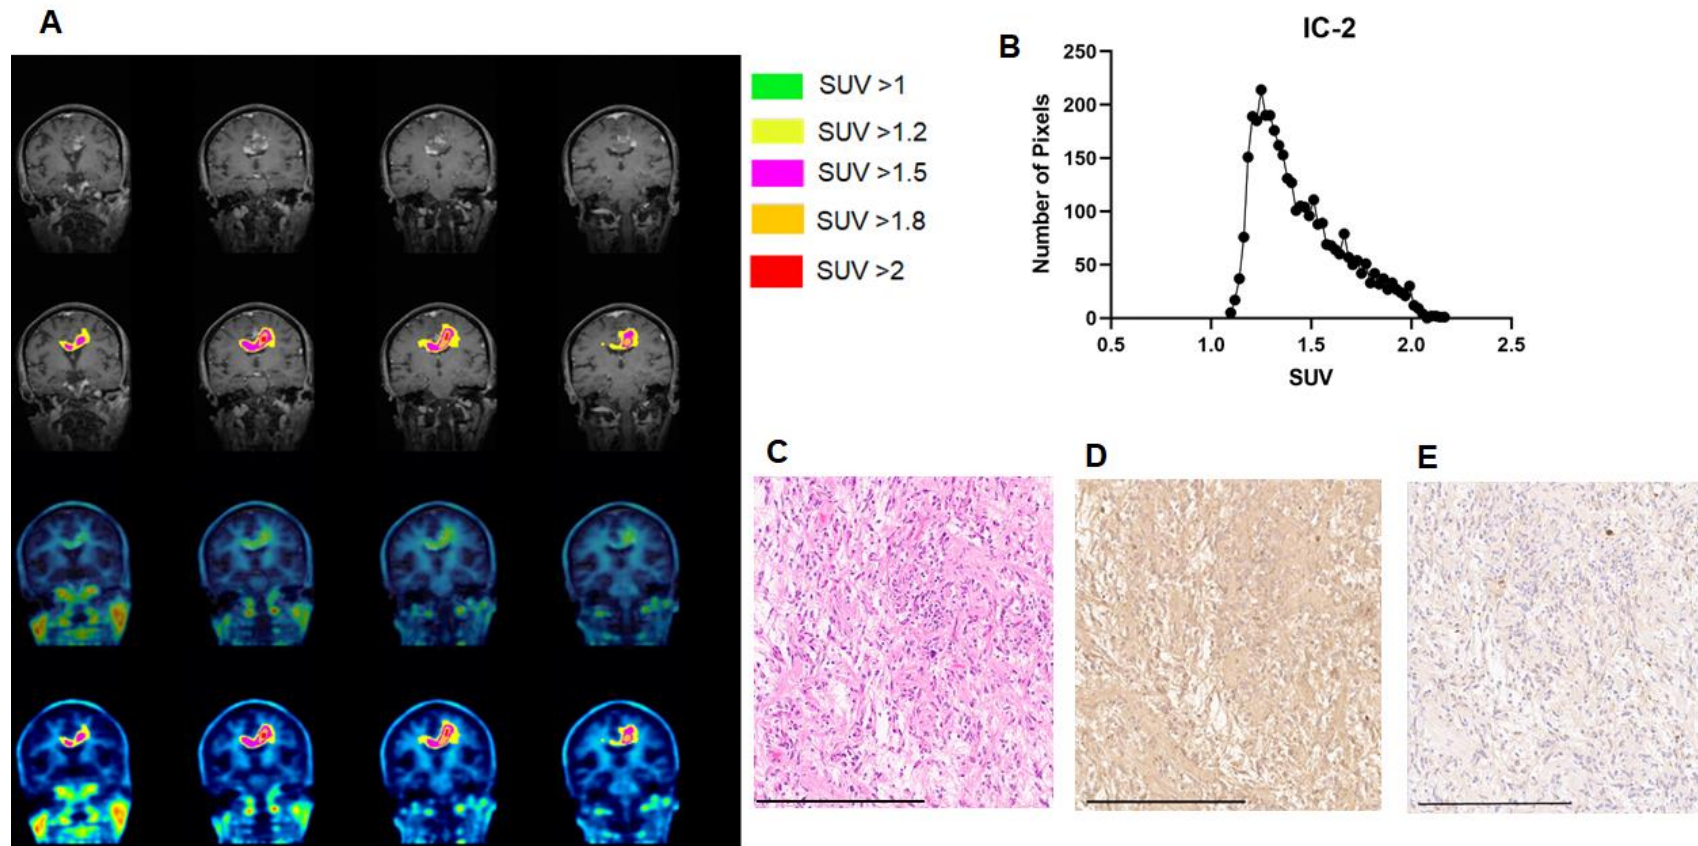

**Supplemental Fig. 8.** Imaging of IC-2. **a** Row 1: contrast enhanced T1-weighted MRI image slices in the coronal plane are shown. Row 2: Concentric volumes of interest from  $[^{18}\text{F}]\text{DASA-23}$  PET are overlaid on contrast enhanced T1-weighted MRI. Volumes of interest are color scaled according to SUV range in the legend. Row 3: Fused  $[^{18}\text{F}]\text{DASA-23}$  PET and contrast enhanced T1-weighted MRI. Row 4: Concentric volumes of interest from  $[^{18}\text{F}]\text{DASA-23}$  PET are overlaid on the  $[^{18}\text{F}]\text{DASA-23}$  PET image. **b** SUV histogram of IC-2 lesion **c** H&E of the biopsied tissue is shown at 10 $\times$ , scale bar represents 300  $\mu\text{m}$ , **d** PKM2 and **e** PKM1 IHC is shown at 10 $\times$  and scale bar represents 300  $\mu\text{m}$ .
