# Supplementary material
Source: PubMed Central journal article supplement (PMC8639752)
Supplement: NIHMS1738932-supplement-16.pdf [file NIHMS1738932-supplement-16.pdf]

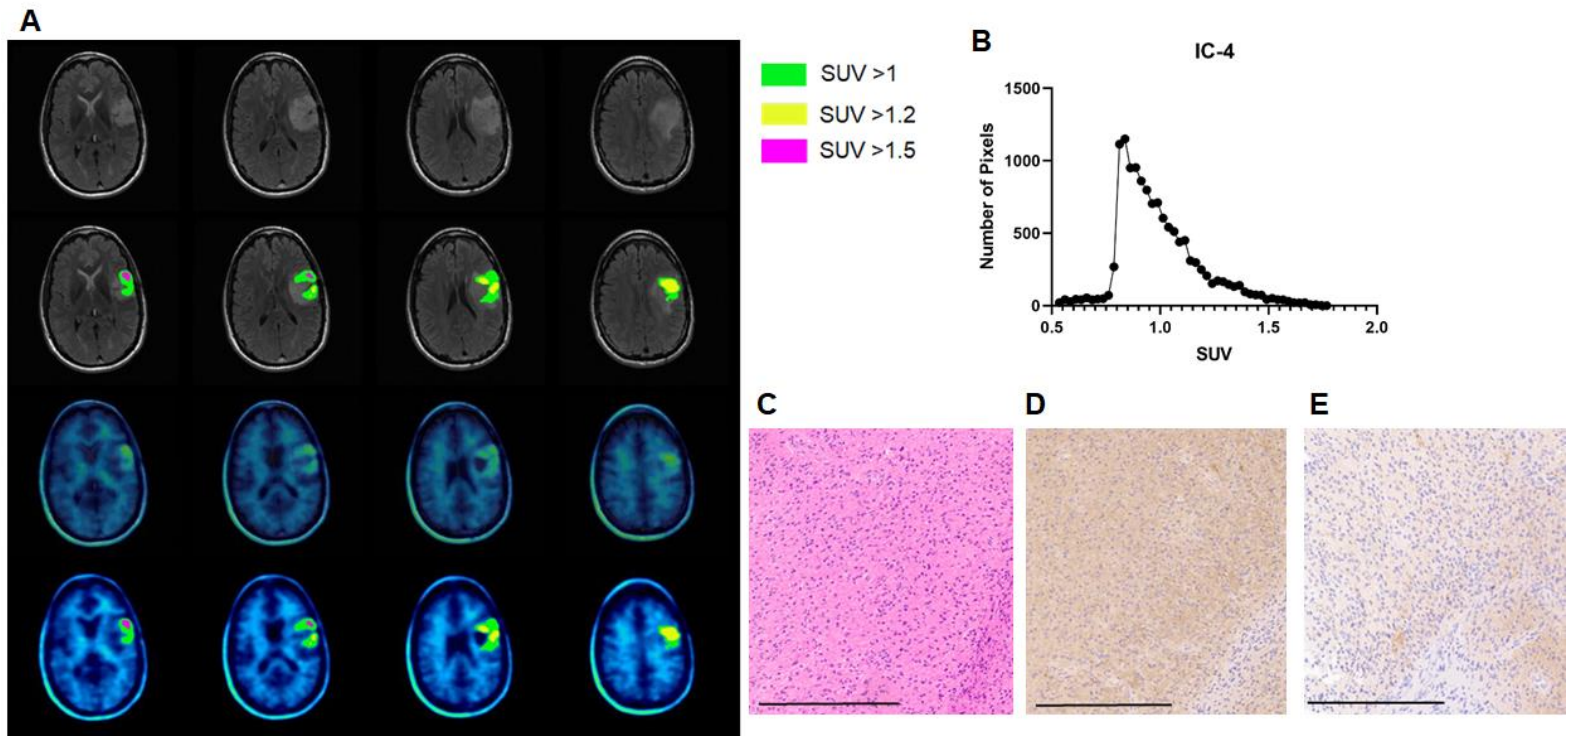

**Supplemental Fig. 10.** Imaging of IC-4. **a** Row 1: contrast enhanced T1-weighted MRI image slices in the coronal plane are shown. Row 2: Concentric volumes of interest from [ $^{18}\text{F}$ ]DASA-23 PET are overlaid on contrast enhanced T1-weighted MRI. Volumes of interest are color scaled according to SUV range in the legend. Row 3: Fused [ $^{18}\text{F}$ ]DASA-23 PET and contrast enhanced T1-weighted MRI. Row 4: Concentric volumes of interest from [ $^{18}\text{F}$ ]DASA-23 PET are overlaid on the [ $^{18}\text{F}$ ]DASA-23 PET image. **b** SUV histogram of IC-4 lesion **c** H&E of the biopsied tissue is shown at 10 $\times$ , scale bar represents 300  $\mu\text{m}$  **d** PKM2 and **e** PKM1 IHC of the biopsied tissue is shown at 10 $\times$ , scale bar represents 300  $\mu\text{m}$
