# Supplementary material
Source: PubMed Central journal article supplement (PMC8639752)

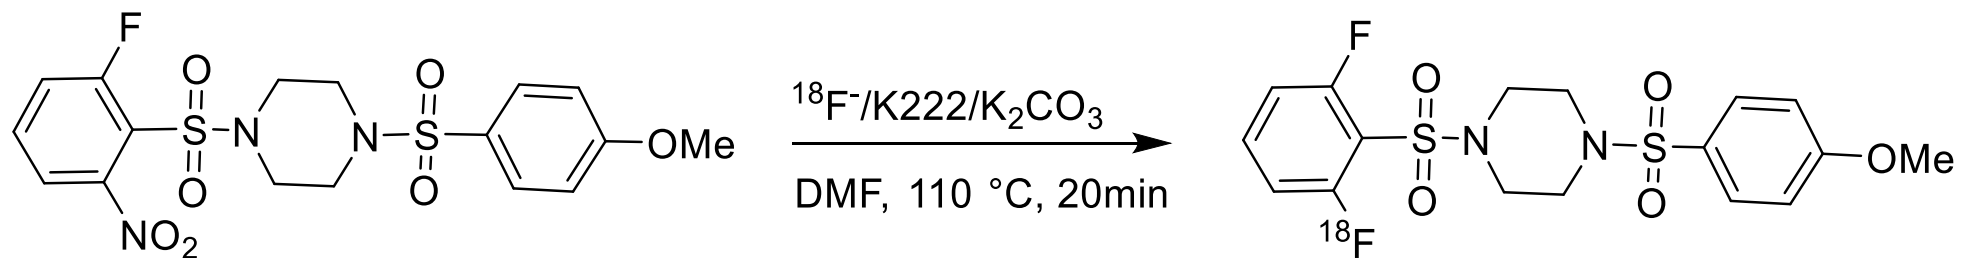

**Supplemental Fig. 1.** Radiosynthesis of  $[^{18}\text{F}]$ DASA-23

Supplement: NIHMS1738932-supplement-1.pdf [file NIHMS1738932-supplement-1.pdf]
